# Supplementary material for: Cannabinoids Promote Progression of HPV-Positive Head and Neck Squamous Cell Carcinoma via p38 MAPK Activation
Source: Oxford University Press journal article supplement (doi:10.1158/1078-0432.ccr-18-3301), 2020-01-13
Supplement: 10780432ccr183301-sup-210168_2_supp_5971002_q2p6mw.xlsx [file 10780432ccr183301-sup-210168_2_supp_5971002_q2p6mw.xlsx]

## Sheet: Sheet1
Supplemental Table S1. Expression of cannabinoids and their metabolites in plasma samples of HPV positive HNSCC patients
LLOQ (ng/mL)	1	1	1	2	2	2	1
Patients ID	CBN	CBD	THC	11-OH-THC	THC-COOH	CBG	THC-V
Sample 1	<LLOQ	<LLOQ	4	2.4	52.2	<LLOQ	<LLOQ
Sample 2	<LLOQ	<LLOQ	<LLOQ	<LLOQ	3.6	<LLOQ	<LLOQ
Sample 3	<LLOQ	<LLOQ	<LLOQ	<LLOQ	20.2	<LLOQ	<LLOQ
Sample 4	<LLOQ	<LLOQ	<LLOQ	<LLOQ	2.8	<LLOQ	<LLOQ
Sample 5	<LLOQ	<LLOQ	<LLOQ	<LLOQ	2.2	<LLOQ	<LLOQ
Sample 6	<LLOQ	<LLOQ	<LLOQ	<LLOQ	<LLOQ	<LLOQ	<LLOQ
Sample 7	<LLOQ	<LLOQ	<LLOQ	<LLOQ	<LLOQ	<LLOQ	<LLOQ
Sample 8	<LLOQ	<LLOQ	<LLOQ	<LLOQ	<LLOQ	<LLOQ	<LLOQ
Sample 9	<LLOQ	<LLOQ	<LLOQ	<LLOQ	<LLOQ	<LLOQ	<LLOQ
Sample 10	<LLOQ	<LLOQ	<LLOQ	<LLOQ	<LLOQ	<LLOQ	<LLOQ
Sample 11	<LLOQ	<LLOQ	<LLOQ	<LLOQ	<LLOQ	<LLOQ	<LLOQ
Sample 12	<LLOQ	<LLOQ	<LLOQ	<LLOQ	<LLOQ	<LLOQ	<LLOQ
Sample 13	<LLOQ	<LLOQ	<LLOQ	<LLOQ	<LLOQ	<LLOQ	<LLOQ
Sample 14	<LLOQ	<LLOQ	<LLOQ	<LLOQ	<LLOQ	<LLOQ	<LLOQ
Sample 15	<LLOQ	<LLOQ	<LLOQ	<LLOQ	<LLOQ	<LLOQ	<LLOQ
Sample 16	<LLOQ	<LLOQ	<LLOQ	<LLOQ	<LLOQ	<LLOQ	<LLOQ
Sample 17	<LLOQ	<LLOQ	<LLOQ	<LLOQ	<LLOQ	<LLOQ	<LLOQ
Sample 18	<LLOQ	<LLOQ	<LLOQ	<LLOQ	<LLOQ	<LLOQ	<LLOQ
Sample 19	<LLOQ	<LLOQ	<LLOQ	<LLOQ	<LLOQ	<LLOQ	<LLOQ
Sample 20	<LLOQ	<LLOQ	<LLOQ	<LLOQ	<LLOQ	<LLOQ	<LLOQ
Sample 21	<LLOQ	<LLOQ	<LLOQ	<LLOQ	<LLOQ	<LLOQ	<LLOQ
Sample 22	<LLOQ	<LLOQ	<LLOQ	<LLOQ	<LLOQ	<LLOQ	<LLOQ
Sample 23	<LLOQ	<LLOQ	<LLOQ	<LLOQ	<LLOQ	<LLOQ	<LLOQ
Sample 24	<LLOQ	<LLOQ	<LLOQ	<LLOQ	<LLOQ	<LLOQ	<LLOQ
Sample 25	<LLOQ	<LLOQ	<LLOQ	<LLOQ	<LLOQ	<LLOQ	<LLOQ
Sample 26	<LLOQ	<LLOQ	<LLOQ	<LLOQ	<LLOQ	<LLOQ	<LLOQ
Sample 27	<LLOQ	<LLOQ	<LLOQ	<LLOQ	<LLOQ	<LLOQ	<LLOQ
Sample 28	<LLOQ	<LLOQ	<LLOQ	<LLOQ	<LLOQ	<LLOQ	<LLOQ
Sample 29	<LLOQ	<LLOQ	<LLOQ	<LLOQ	<LLOQ	<LLOQ	<LLOQ
Sample 30	<LLOQ	<LLOQ	<LLOQ	<LLOQ	<LLOQ	<LLOQ	<LLOQ
Sample 31	<LLOQ	<LLOQ	<LLOQ	<LLOQ	<LLOQ	<LLOQ	<LLOQ
Sample 32	<LLOQ	<LLOQ	<LLOQ	<LLOQ	<LLOQ	<LLOQ	<LLOQ
*LLOQ: lower limit of quantification
