# Supplementary material for: Cannabinoids Promote Progression of HPV-Positive Head and Neck Squamous Cell Carcinoma via p38 MAPK Activation
Source: Oxford University Press journal article supplement (doi:10.1158/1078-0432.ccr-18-3301), 2020-01-13
Supplement: 10780432ccr183301-sup-210168_2_supp_5971003_q2p6mw.xlsx [file 10780432ccr183301-sup-210168_2_supp_5971003_q2p6mw.xlsx]

## Sheet: Table S2
	Supplemental Table S2. Correlations between cannabinoids exposure and clinicopathological parameters
	Parameters		No. of patients	Cannabinoids positive	Cannabinoids negative	P value
	Age
		<56	17	3	14	>0.9999
		≥56	15	2	13
	Gender
		Male	29	5	24	>0.9999
		Female	3	0	3
	Smoking
		Yes	19	3	16	>0.9999
		No	13	2	11
	Alcohol*
		Yes	23	3	20	>0.9999
		No	6	1	5
	Note:* 3 cases unknown; P value was determined by Fisher's exact test
