# Supplementary material for: Cannabinoids Promote Progression of HPV-Positive Head and Neck Squamous Cell Carcinoma via p38 MAPK Activation
Source: Oxford University Press journal article supplement (doi:10.1158/1078-0432.ccr-18-3301), 2020-01-13
Supplement: 10780432ccr183301-sup-210168_2_supp_5971004_q2p6mw.xlsx [file 10780432ccr183301-sup-210168_2_supp_5971004_q2p6mw.xlsx]

## Sheet: Up-regulated pathway
Supplemental Table S3-1. Up-regulated pathways in patients with cannabinoid metabolites compared with patients without cannabinoid metabolites
Gene Set	Score	p-value	FDR
REACTOME_SIGNALING_BY_ACTIVATED_POINT_MUTANTS_OF_FGFR1	0.685204	7.54262e-06	0.05
GO_SKELETAL_MUSCLE_TISSUE_REGENERATION	0.631992	7.54262e-06	0.05
GO_REGULATION_OF_CARDIAC_MUSCLE_CELL_PROLIFERATION	0.618463	1.50852e-05	0.05
PID_HEDGEHOG_GLI_PATHWAY	0.616847	1.50852e-05	0.05
GO_POSITIVE_REGULATION_OF_CARDIAC_MUSCLE_CELL_PROLIFERATION	0.604649	2.26278e-05	0.0571429
GO_SYNAPTIC_TRANSMISSION_DOPAMINERGIC	0.595539	3.01705e-05	0.0571429
CAIRO_HEPATOBLASTOMA_UP	0.592571	3.01705e-05	0.0571429
FIGUEROA_AML_METHYLATION_CLUSTER_7_DN	0.584837	5.27983e-05	0.0777778
IPA_FIGLA_UP	0.580707	5.27983e-05	0.0777778
GO_EUCHROMATIN	0.58006	6.78835e-05	0.09
GO_MYOTUBE_DIFFERENTIATION	0.579095	8.29688e-05	0.1
BOYLAN_MULTIPLE_MYELOMA_C_UP	0.575334	0.000105597	0.116667
SHIRAISHI_PLZF_TARGETS_DN	0.57365	0.000120682	0.123077
REACTOME_FGFR1_LIGAND_BINDING_AND_ACTIVATION	0.568214	0.000158395	0.141176
GO_MESENCHYMAL_TO_EPITHELIAL_TRANSITION	0.567108	0.000165938	0.141176
GO_CELL_COMMUNICATION_BY_ELECTRICAL_COUPLING	0.564563	0.00017348	0.141176
IPA_POU4F1_UP	0.562975	0.000181023	0.141176
REACTOME_ACTIVATED_POINT_MUTANTS_OF_FGFR2	0.555484	0.000226278	0.157143
GO_LIMBIC_SYSTEM_DEVELOPMENT	0.554633	0.000233821	0.157143
GO_REGULATION_OF_SYNAPSE_ORGANIZATION	0.551668	0.000248906	0.157143
GO_FRIZZLED_BINDING	0.551554	0.000248906	0.157143
GO_POSITIVE_REGULATION_OF_HEART_GROWTH	0.550589	0.000263992	0.159091
GO_ESTABLISHMENT_OF_LOCALIZATION_BY_MOVEMENT_ALONG_MICROTUBULE	0.545132	0.00031679	0.176667
GO_CYTOSKELETON_DEPENDENT_INTRACELLULAR_TRANSPORT	0.541441	0.00034696	0.176667
GO_REGULATION_OF_CHROMATIN_SILENCING	0.541413	0.00034696	0.176667
REACTOME_FGFR4_LIGAND_BINDING_AND_ACTIVATION	0.541012	0.000354503	0.176667
YGCGYRCGC_UNKNOWN	0.538205	0.000384673	0.176667
BOYAULT_LIVER_CANCER_SUBCLASS_G12_UP	0.537567	0.000384673	0.176667
GO_CYTOPLASMIC_MICROTUBULE	0.536469	0.000399759	0.176667
ETF_Q6	0.536363	0.000399759	0.176667
HANN_RESISTANCE_TO_BCL2_INHIBITOR_UP	0.53273	0.000422386	0.177143
KEGG_HEDGEHOG_SIGNALING_PATHWAY	0.530232	0.000437472	0.177143
ATAGGAA_MIR202	0.528263	0.0004601	0.177143
NAKAYAMA_SOFT_TISSUE_TUMORS_PCA1_DN	0.527614	0.0004601	0.177143
MYAATNNNNNNNGGC_UNKNOWN	0.527078	0.000467642	0.177143
AAACCAC_MIR140	0.523373	0.000527983	0.194444
GO_POSITIVE_REGULATION_OF_CELL_FATE_COMMITMENT	0.522297	0.000543068	0.194595
E2F_Q3	0.517422	0.000671293	0.22439
GO_NEGATIVE_REGULATION_OF_SMOOTHENED_SIGNALING_PATHWAY	0.516606	0.000686378	0.22439
GO_REGULATION_OF_CHOLESTEROL_METABOLIC_PROCESS	0.516064	0.000693921	0.22439
GO_RAN_GTPASE_BINDING	0.51571	0.000693921	0.22439
GO_SOMATIC_STEM_CELL_DIVISION	0.513282	0.000754262	0.227273
MYLLYKANGAS_AMPLIFICATION_HOT_SPOT_22	0.513074	0.000754262	0.227273
REACTOME_FGFR2C_LIGAND_BINDING_AND_ACTIVATION	0.513001	0.000754262	0.227273
GO_CEREBRAL_CORTEX_DEVELOPMENT	0.510748	0.000799517	0.230435
PID_WNT_SIGNALING_PATHWAY	0.510737	0.000799517	0.230435
IPA_ARX_UP	0.509623	0.000867401	0.242
BOHN_PRIMARY_IMMUNODEFICIENCY_SYNDROM_UP	0.508684	0.000897571	0.242
CREIGHTON_ENDOCRINE_THERAPY_RESISTANCE_4	0.507896	0.000912657	0.242
GO_REGULATION_OF_VOLTAGE_GATED_CALCIUM_CHANNEL_ACTIVITY	0.50787	0.000912657	0.242
REN_ALVEOLAR_RHABDOMYOSARCOMA_UP	0.505878	0.000995625	0.258824
GO_GLYCINE_METABOLIC_PROCESS	0.501755	0.00105597	0.269231
IPA_SALL3_DN	0.500847	0.00108614	0.271698
GO_REGULATION_OF_CELL_FATE_COMMITMENT	0.497988	0.00116911	0.287037
GO_PROSTATE_GLAND_GROWTH	0.496763	0.00120682	0.287719
GO_GLUTAMINE_METABOLIC_PROCESS	0.495774	0.00122945	0.287719
GO_MICROTUBULE_BASED_MOVEMENT	0.495647	0.00123699	0.287719
GEORGES_CELL_CYCLE_MIR192_TARGETS	0.494768	0.00125962	0.287931
GO_CHROMATIN_MODIFICATION	0.494097	0.0013275	0.289855
MORI_EMU_MYC_LYMPHOMA_BY_ONSET_TIME_UP	0.493955	0.0013275	0.289855
GO_MAINTENANCE_OF_CELL_NUMBER	0.493468	0.00133504	0.289855
GO_POSITIVE_REGULATION_OF_HISTONE_METHYLATION	0.493006	0.00136521	0.289855
GO_PROTEIN_BINDING_INVOLVED_IN_CELL_ADHESION	0.492019	0.0013803	0.289855
E2F_Q6	0.489548	0.00142555	0.289855
GGATCCG_MIR127	0.489254	0.00144064	0.289855
ROZANOV_MMP14_CORRELATED	0.488255	0.00145572	0.289855
E2F4DP1_01	0.487301	0.00149344	0.289855
GO_NUCLEAR_ENVELOPE	0.487107	0.00150098	0.289855
GO_DEVELOPMENTAL_MATURATION	0.486937	0.00150852	0.289855
E2F1DP1RB_01	0.486644	0.00153115	0.29
GENTLES_LEUKEMIC_STEM_CELL_DN	0.485764	0.00156886	0.290789
BIOCARTA_ACE2_PATHWAY	0.484591	0.00161412	0.290789
GO_LYMPH_VESSEL_DEVELOPMENT	0.484258	0.00162921	0.290789
GO_SODIUM_INDEPENDENT_ORGANIC_ANION_TRANSPORT	0.484037	0.00163675	0.290789
GO_ACETYLTRANSFERASE_COMPLEX	0.483574	0.00165938	0.290789
GO_POSITIVE_REGULATION_OF_CARDIAC_MUSCLE_TISSUE_DEVELOPMENT	0.48314	0.00166692	0.290789
GO_NEGATIVE_REGULATION_OF_SKELETAL_MUSCLE_TISSUE_DEVELOPMENT	0.482695	0.00171972	0.296104
E2F1_Q3	0.482322	0.00174234	0.296154
TURJANSKI_MAPK1_AND_MAPK2_TARGETS	0.478195	0.00196862	0.31828
MIF1_01	0.478081	0.00197617	0.31828
IPA_HOXA13_DN	0.477779	0.00198371	0.31828
E2F_02	0.475398	0.00211193	0.31828
VETTER_TARGETS_OF_PRKCA_AND_ETS1_UP	0.475175	0.00212702	0.31828
LI_CYTIDINE_ANALOGS_CYCTOTOXICITY	0.475108	0.00213456	0.31828
E2F_Q4	0.474793	0.00214965	0.31828
E2F1DP1_01	0.474148	0.00217227	0.31828
AGGGCCA_MIR328	0.47363	0.0021949	0.31828
KCCGNSWTTT_UNKNOWN	0.473582	0.0021949	0.31828
GO_HEPARAN_SULFATE_PROTEOGLYCAN_BIOSYNTHETIC_PROCESS	0.473533	0.0021949	0.31828
MUNSHI_MULTIPLE_MYELOMA_DN	0.473428	0.0021949	0.31828
GO_MICROTUBULE_BASED_PROCESS	0.47288	0.00222507	0.31828
GO_VENTRICULAR_SEPTUM_MORPHOGENESIS	0.472875	0.00222507	0.31828
IPA_DLX2_UP	0.472252	0.00223261	0.31828
E2F1_Q6	0.471358	0.00230804	0.318447
KERLEY_RESPONSE_TO_CISPLATIN_DN	0.471306	0.00231558	0.318447
GACTGTT_MIR212_MIR132	0.470433	0.0023533	0.318447
ZEMBUTSU_SENSITIVITY_TO_METHOTREXATE	0.469782	0.00241364	0.318447
KRAS_comp.8_8L	0.469573	0.00242118	0.318447
GTTAAAG_MIR302B	0.468962	0.00244381	0.318447
GO_PEPTIDYL_LYSINE_MODIFICATION	0.46885	0.00245135	0.318447
BIOCARTA_PITX2_PATHWAY	0.468839	0.00245135	0.318447
ST_GRANULE_CELL_SURVIVAL_PATHWAY	0.468567	0.00246644	0.318447
GO_BETA_CATENIN_TCF_COMPLEX_ASSEMBLY	0.468532	0.00247398	0.318447
GO_STEM_CELL_DIVISION	0.46734	0.00254186	0.324038
GATGKMRGCG_UNKNOWN	0.466443	0.00259466	0.327619
GO_NEURON_FATE_COMMITMENT	0.46447	0.0027078	0.338679
GO_DOPAMINE_RECEPTOR_BINDING	0.463976	0.00279831	0.34537
GO_REGULATION_OF_CARDIAC_MUSCLE_TISSUE_DEVELOPMENT	0.463898	0.0028134	0.34537
GO_CILIUM_OR_FLAGELLUM_DEPENDENT_CELL_MOTILITY	0.463416	0.00286619	0.345455
GO_ENTEROENDOCRINE_CELL_DIFFERENTIATION	0.463281	0.00286619	0.345455
IPA_EBF1_DN	0.461992	0.00294162	0.351351
COLDREN_GEFITINIB_RESISTANCE_UP	0.461013	0.00303213	0.354386
REACTOME_SIGNAL_ATTENUATION	0.460983	0.00303213	0.354386
GO_POSITIVE_REGULATION_OF_MUSCLE_TISSUE_DEVELOPMENT	0.46073	0.00304722	0.354386
NEBEN_AML_WITH_FLT3_OR_NRAS_DN	0.45981	0.0031151	0.355932
ST_P38_MAPK_PATHWAY	0.459425	0.00316036	0.355932
GO_CHROMATIN_DISASSEMBLY	0.459369	0.00316036	0.355932
IPA_MYBL2_UP	0.459216	0.0031679	0.355932
GO_REGENERATION	0.458408	0.0032207	0.358824
IPA_PBX1_UP	0.457661	0.00325841	0.36
REACTOME_ACTIVATION_OF_BH3_ONLY_PROTEINS	0.456048	0.00340172	0.372727
GTGCAAT_MIR25_MIR32_MIR92_MIR363_MIR367	0.455179	0.0034696	0.375806
GO_GAMETE_GENERATION	0.454942	0.00349223	0.375806
IPA_TCF12_UP	0.454611	0.00351486	0.375806
GO_PROTEOGLYCAN_BIOSYNTHETIC_PROCESS	0.453557	0.00363554	0.383594
GO_NEURONAL_ION_CHANNEL_CLUSTERING	0.453073	0.0036808	0.383594
GO_REGULATION_OF_ESTABLISHMENT_OF_PLANAR_POLARITY	0.45304	0.0036808	0.383594
BIOCARTA_VITCB_PATHWAY	0.452659	0.00370342	0.383594
GO_CILIARY_TIP	0.451084	0.00388445	0.396154
HOLLEMAN_PREDNISOLONE_RESISTANCE_ALL_DN	0.451067	0.00388445	0.396154
LASTOWSKA_COAMPLIFIED_WITH_MYCN	0.450343	0.00393725	0.396212
GO_CHONDROITIN_SULFATE_PROTEOGLYCAN_BIOSYNTHETIC_PROCESS	0.449962	0.00394479	0.396212
GO_LIPID_PARTICLE_ORGANIZATION	0.449391	0.00399004	0.397744
HOFFMANN_PRE_BI_TO_LARGE_PRE_BII_LYMPHOCYTE_UP	0.446879	0.00425404	0.407746
GO_SPINDLE_MIDZONE	0.446757	0.00428421	0.407746
GO_CELL_MATURATION	0.446732	0.00428421	0.407746
GO_PROTEIN_HETEROTRIMERIZATION	0.446565	0.00430683	0.407746
GRYDER_PAX3FOXO1_TOP_ENHANCERS	0.446197	0.004337	0.407746
GO_REGULATION_OF_TRANSCRIPTION_FROM_RNA_POLYMERASE_I_PROMOTER	0.446018	0.00434455	0.407746
GO_ENDODEOXYRIBONUCLEASE_ACTIVITY_PRODUCING_5_PHOSPHOMONOESTERS	0.445703	0.00435963	0.407746
SETLUR_PROSTATE_CANCER_TMPRSS2_ERG_FUSION_UP	0.445559	0.00436717	0.407746
GO_NPBAF_COMPLEX	0.445274	0.00436717	0.407746
GARGALOVIC_RESPONSE_TO_OXIDIZED_PHOSPHOLIPIDS_MAGENTA_DN	0.444051	0.00453311	0.41745
GO_TRANSCRIPTION_FACTOR_TFTC_COMPLEX	0.443767	0.0045482	0.41745
GO_REGULATION_OF_MITOCHONDRIAL_TRANSLATION	0.442656	0.00464625	0.41745
TESAR_ALK_TARGETS_EPISC_3D_UP	0.442598	0.00465379	0.41745
GO_NEGATIVE_REGULATION_OF_CHROMOSOME_ORGANIZATION	0.442455	0.00465379	0.41745
LUCAS_HNF4A_TARGETS_DN	0.442261	0.00468396	0.41745
GO_NEGATIVE_REGULATION_OF_AXON_GUIDANCE	0.442013	0.00469151	0.41745
GO_CELLULAR_RESPONSE_TO_REACTIVE_NITROGEN_SPECIES	0.441343	0.00481973	0.426
GO_PROTEIN_ACYLATION	0.440851	0.00486499	0.427152
BIOCARTA_SHH_PATHWAY	0.440193	0.00494041	0.430921
GO_POSITIVE_REGULATION_OF_AMINO_ACID_TRANSPORT	0.439839	0.00498567	0.432026
IPA_BHLHE22_UP	0.437789	0.00521949	0.447399
MCBRYAN_TERMINAL_END_BUD_DN	0.436536	0.00539297	0.447399
GO_REGULATION_OF_FATTY_ACID_BETA_OXIDATION	0.436241	0.00540806	0.447399
MEF2_03	0.43537	0.00552119	0.447399
GO_NEGATIVE_REGULATION_OF_CARDIAC_MUSCLE_TISSUE_DEVELOPMENT	0.43532	0.00553628	0.447399
KEGG_WNT_SIGNALING_PATHWAY	0.434892	0.00558154	0.447399
GO_REGULATION_OF_FIBROBLAST_MIGRATION	0.434741	0.00558908	0.447399
ACEVEDO_LIVER_CANCER_WITH_H3K27ME3_DN	0.43421	0.00567959	0.447399
ACCTGTTG_UNKNOWN	0.434044	0.00567959	0.447399
IPA_E2F3_UP	0.43404	0.00567959	0.447399
IPA_TFAP2C_UP	0.433871	0.00567959	0.447399
E2F_03	0.433824	0.00567959	0.447399
GO_SMOOTHENED_SIGNALING_PATHWAY	0.43377	0.00567959	0.447399
GTACTGT_MIR101	0.433655	0.00569467	0.447399
GO_SEXUAL_REPRODUCTION	0.43306	0.00572485	0.447399
AACATTC_MIR4093P	0.432962	0.00572485	0.447399
IPA_HES2_UP	0.432572	0.00578519	0.447399
TESAR_JAK_TARGETS_MOUSE_ES_D3_DN	0.432263	0.00579273	0.447399
KEGG_MATURITY_ONSET_DIABETES_OF_THE_YOUNG	0.432044	0.00581536	0.447399
CAGNYGKNAAA_UNKNOWN	0.431933	0.00583798	0.447399
GO_MITOTIC_CHROMOSOME_CONDENSATION	0.4299	0.00607935	0.463218
IPA_RBPJ_UP	0.428799	0.00624529	0.466316
GO_COATED_MEMBRANE	0.428664	0.00626791	0.466316
BIOCARTA_NEUROTRANSMITTERS_PATHWAY	0.42865	0.00626791	0.466316
RICKMAN_TUMOR_DIFFERENTIATED_WELL_VS_POORLY_UP	0.428365	0.00631317	0.466316
TUOMISTO_TUMOR_SUPPRESSION_BY_COL13A1_DN	0.428041	0.00635843	0.466316
GO_NEGATIVE_REGULATION_OF_DNA_RECOMBINATION	0.427827	0.00639614	0.466316
GO_CHROMOSOME_CONDENSATION	0.427731	0.00643385	0.466316
NGFIC_01	0.427669	0.00645648	0.466316
KEGG_VALINE_LEUCINE_AND_ISOLEUCINE_BIOSYNTHESIS	0.427519	0.00645648	0.466316
NIELSEN_SCHWANNOMA_DN	0.427067	0.00652436	0.466316
GO_NUCLEAR_MEMBRANE	0.426828	0.00653945	0.466316
GO_C2H2_ZINC_FINGER_DOMAIN_BINDING	0.426698	0.00656208	0.466316
GAUSSMANN_MLL_AF4_FUSION_TARGETS_D_UP	0.425892	0.0066375	0.466316
VANHARANTA_UTERINE_FIBROID_UP	0.425877	0.0066375	0.466316
GO_BRANCHING_INVOLVED_IN_URETERIC_BUD_MORPHOGENESIS	0.425722	0.00665259	0.466316
GO_CHONDROITIN_SULFATE_BIOSYNTHETIC_PROCESS	0.425569	0.00668276	0.466316
E2F_Q3_01	0.425378	0.00673556	0.467539
IPA_HESX1_DN	0.425028	0.00680344	0.469036
GO_FILOPODIUM_MEMBRANE	0.424807	0.00687132	0.469036
IPA_KDM6B_DN	0.424773	0.00688641	0.469036
GO_CELLULAR_RESPONSE_TO_NITRIC_OXIDE	0.42467	0.00693921	0.469036
GO_GOLGI_TO_PLASMA_MEMBRANE_PROTEIN_TRANSPORT	0.424633	0.00693921	0.469036
CHIANG_LIVER_CANCER_SUBCLASS_INTERFERON_DN	0.424504	0.00696938	0.469036
CCAWNWWNNNGGC_UNKNOWN	0.423742	0.0070448	0.471717
GO_EMBRYONIC_DIGIT_MORPHOGENESIS	0.423455	0.00710514	0.47277
ROESSLER_LIVER_CANCER_METASTASIS_UP	0.423201	0.00714286	0.47277
IPA_CREB3L3_UP	0.422575	0.00724091	0.47277
GO_MLL1_2_COMPLEX	0.422539	0.00724091	0.47277
ATGTACA_MIR493	0.422212	0.00727108	0.47277
GO_RETROGRADE_VESICLE_MEDIATED_TRANSPORT_GOLGI_TO_ER	0.421877	0.00733142	0.47277
GO_POSITIVE_REGULATION_OF_STEM_CELL_PROLIFERATION	0.421619	0.00736159	0.47277
MUELLER_COMMON_TARGETS_OF_AML_FUSIONS_UP	0.42137	0.00737668	0.47277
SPZ1_01	0.420913	0.00746719	0.47277
GO_EXTRACELLULAR_REGULATION_OF_SIGNAL_TRANSDUCTION	0.420582	0.00751245	0.47277
REACTOME_DOWNREGULATION_OF_SMAD2_3_SMAD4_TRANSCRIPTIONAL_ACTIVITY	0.420171	0.00756524	0.47277
TURASHVILI_BREAST_NORMAL_DUCTAL_VS_LOBULAR_DN	0.420018	0.00757279	0.47277
SCHRAMM_INHBA_TARGETS_UP	0.419774	0.00758787	0.47277
GO_PROTEIN_CHROMOPHORE_LINKAGE	0.419736	0.00758787	0.47277
TTGCACT_MIR130A_MIR301_MIR130B	0.41971	0.00759541	0.47277
SILIGAN_BOUND_BY_EWS_FLT1_FUSION	0.419016	0.00770855	0.474545
GO_MALE_SEX_DETERMINATION	0.418734	0.00773118	0.474545
VERHAAK_GLIOBLASTOMA_PRONEURAL	0.418156	0.00782924	0.474545
GTGGTGA_MIR197	0.418086	0.00782924	0.474545
BRAF.Breast_HMLE_Skin_PMEL.24_UP	0.418083	0.00782924	0.474545
GO_AXOLEMMA	0.417501	0.00787449	0.474545
GO_SWI_SNF_COMPLEX	0.417425	0.00787449	0.474545
GO_GLIAL_CELL_FATE_COMMITMENT	0.416957	0.00794237	0.476471
KMCATNNWGGA_UNKNOWN	0.416454	0.00805551	0.481081
GO_PRC1_COMPLEX	0.416089	0.00815357	0.482609
IPA_NANOG_DN	0.415889	0.00822145	0.482609
TESAR_JAK_TARGETS_MOUSE_ES_D3_UP	0.415834	0.00823654	0.482609
ODONNELL_TARGETS_OF_MYC_AND_TFRC_DN	0.415638	0.00828933	0.482609
LIN_NPAS4_TARGETS_DN	0.415486	0.00831196	0.482609
GO_REGULATION_OF_SYNAPSE_STRUCTURE_OR_ACTIVITY	0.415283	0.00834213	0.482609
GO_NEUROPEPTIDE_RECEPTOR_ACTIVITY	0.415018	0.0083723	0.482609
LIU_COMMON_CANCER_GENES	0.414992	0.0083723	0.482609
NIELSEN_SYNOVIAL_SARCOMA_UP	0.414634	0.00846281	0.485593
E2F1_Q6_01	0.413983	0.00857595	0.485593
LEF1_Q2	0.413685	0.00862875	0.485593
GO_INNATE_IMMUNE_RESPONSE_IN_MUCOSA	0.413661	0.00862875	0.485593
GO_REGULATION_OF_BONE_DEVELOPMENT	0.413658	0.00862875	0.485593
GO_LYMPHANGIOGENESIS	0.413629	0.00864384	0.485593
NAGY_TFTC_COMPONENTS_HUMAN	0.412811	0.0087796	0.489916
BOYLAN_MULTIPLE_MYELOMA_C_CLUSTER_UP	0.412698	0.00879469	0.489916
KEGG_RENIN_ANGIOTENSIN_SYSTEM	0.412434	0.00883995	0.49
GO_PROTEIN_MONOUBIQUITINATION	0.41234	0.00887012	0.49
GARGALOVIC_RESPONSE_TO_OXIDIZED_PHOSPHOLIPIDS_RED_UP	0.411329	0.00905868	0.491463
GO_DORSAL_VENTRAL_NEURAL_TUBE_PATTERNING	0.411163	0.00908131	0.491463
GO_TRANSCRIPTION_FACTOR_ACTIVITY_RNA_POLYMERASE_II_DISTAL_ENHANCER_SEQUENCE_SPECIFIC_BINDING	0.411143	0.00908131	0.491463
GO_REGULATION_OF_HEART_GROWTH	0.411005	0.00908885	0.491463
SMID_BREAST_CANCER_LUMINAL_A_DN	0.410914	0.00909639	0.491463
GO_POSITIVE_REGULATION_OF_G1_S_TRANSITION_OF_MITOTIC_CELL_CYCLE	0.410835	0.00911902	0.491463
LIN_MELANOMA_COPY_NUMBER_UP	0.410472	0.00919445	0.493522
STEIN_ESRRA_TARGETS_RESPONSIVE_TO_ESTROGEN_DN	0.410136	0.00925479	0.494758
MATHEW_FANCONI_ANEMIA_GENES	0.409722	0.00935284	0.496
GO_ESTABLISHMENT_OF_MITOTIC_SPINDLE_ORIENTATION	0.409708	0.00935284	0.496
GO_CARDIAC_CELL_FATE_COMMITMENT	0.409384	0.0094509	0.499203
IPA_IRX2_DN	0.408881	0.00957158	0.501172
GO_FIBROBLAST_GROWTH_FACTOR_RECEPTOR_BINDING	0.408819	0.00957912	0.501172
GO_REGULATION_OF_HISTONE_H3_K4_METHYLATION	0.408346	0.00965455	0.501172
GO_MICROTUBULE_ORGANIZING_CENTER_ORGANIZATION	0.408186	0.00967718	0.501172
GO_HOMOPHILIC_CELL_ADHESION_VIA_PLASMA_MEMBRANE_ADHESION_MOLECULES	0.408182	0.00967718	0.501172
REACTOME_FGFR_LIGAND_BINDING_AND_ACTIVATION	0.407447	0.00989591	0.507252
GO_CHROMATIN_ORGANIZATION	0.407192	0.00997134	0.507252
GO_REGULATION_OF_VENTRICULAR_CARDIAC_MUSCLE_CELL_ACTION_POTENTIAL	0.407138	0.00998642	0.507252
REACTOME_VOLTAGE_GATED_POTASSIUM_CHANNELS	0.407112	0.00999397	0.507252
SANSOM_WNT_PATHWAY_REQUIRE_MYC	0.407101	0.00999397	0.507252

## Sheet: Down-regulated pathway
Supplemental Table S3-2. Down-regulated pathways in patients with cannabinoid metabolites compared with patients without cannabinoid metabolites
Gene Set	Score	p-value	FDR
GO_MONOVALENT_INORGANIC_ANION_HOMEOSTASIS	-0.613781	7.54262e-06	0.075
LIANG_SILENCED_BY_METHYLATION_2	-0.590295	2.26278e-05	0.075
CHANG_IMMORTALIZED_BY_HPV31_DN	-0.588894	2.26278e-05	0.075
RB_P107_DN.V1_DN	-0.586976	2.26278e-05	0.075
ETV1.Skin_PMEL.Weeks_UP	-0.584036	4.52557e-05	0.12
TAVOR_CEBPA_TARGETS_DN	-0.575034	6.03409e-05	0.133333
MEKdd.Breast_HMLE_Skin_PMEL_DN	-0.557381	0.000135767	0.209091
YAP.mt_UP	-0.555747	0.000135767	0.209091
LEE_LIVER_CANCER_CIPROFIBRATE_UP	-0.547563	0.000181023	0.209091
PEDERSEN_METASTASIS_BY_ERBB2_ISOFORM_4	-0.547421	0.000188565	0.209091
KRASNOSELSKAYA_ILF3_TARGETS_UP	-0.545741	0.000211193	0.209091
XU_HGF_TARGETS_INDUCED_BY_AKT1_6HR	-0.544156	0.000218736	0.209091
GO_RESPONSE_TO_TEMPERATURE_STIMULUS	-0.54355	0.000218736	0.209091
MIKKELSEN_ES_ICP_WITH_H3K4ME3	-0.539829	0.000248906	0.209091
REACTOME_NUCLEOTIDE_LIKE_PURINERGIC_RECEPTORS	-0.538074	0.000263992	0.209091
GO_PLATELET_MORPHOGENESIS	-0.53732	0.000271534	0.209091
GROSS_ELK3_TARGETS_DN	-0.535792	0.000301705	0.209091
GO_RESPONSE_TO_COLD	-0.535674	0.000301705	0.209091
BMI1_DN.V1_DN	-0.53501	0.000301705	0.209091
GO_RETINOL_DEHYDROGENASE_ACTIVITY	-0.531228	0.000331875	0.209091
GO_FATTY_ACID_BINDING	-0.529905	0.000339418	0.209091
BMI1_DN_MEL18_DN.V1_DN	-0.529662	0.00034696	0.209091
GO_PHOSPHOLIPASE_C_ACTIVATING_G_PROTEIN_COUPLED_RECEPTOR_SIGNALING_PATHWAY	-0.525988	0.000384673	0.212
PETRETTO_BLOOD_PRESSURE_UP	-0.525189	0.000384673	0.212
LEE_LIVER_CANCER_ACOX1_UP	-0.52243	0.000399759	0.212
IPA_MEF2D_DN	-0.514206	0.000527983	0.243333
LUI_THYROID_CANCER_CLUSTER_5	-0.513834	0.000535526	0.243333
GO_FAT_SOLUBLE_VITAMIN_METABOLIC_PROCESS	-0.512525	0.000535526	0.243333
CREIGHTON_ENDOCRINE_THERAPY_RESISTANCE_3	-0.511559	0.000550611	0.243333
LEE_AGING_NEOCORTEX_UP	-0.511216	0.000550611	0.243333
GO_NEGATIVE_REGULATION_OF_RESPONSE_TO_OXIDATIVE_STRESS	-0.510311	0.000588324	0.248889
CONCANNON_APOPTOSIS_BY_EPOXOMICIN_UP	-0.50941	0.00063358	0.248889
KIM_RESPONSE_TO_TSA_AND_DECITABINE_UP	-0.50868	0.000641122	0.248889
GO_REGULATION_OF_PROTEIN_EXIT_FROM_ENDOPLASMIC_RETICULUM	-0.507154	0.000686378	0.248889
GO_BROWN_FAT_CELL_DIFFERENTIATION	-0.50446	0.000761804	0.248889
BORLAK_LIVER_CANCER_EGF_UP	-0.503991	0.000784432	0.248889
KRAS.Breast_HMLE_DN	-0.503064	0.000784432	0.248889
GO_NEGATIVE_REGULATION_OF_ACUTE_INFLAMMATORY_RESPONSE	-0.502961	0.000784432	0.248889
GO_CARBOHYDRATE_TRANSPORT	-0.502033	0.00080706	0.248889
GO_ESTROGEN_BIOSYNTHETIC_PROCESS	-0.501994	0.000814603	0.248889
GO_THIOLESTER_HYDROLASE_ACTIVITY	-0.501652	0.000822145	0.248889
CAIRO_LIVER_DEVELOPMENT_DN	-0.501089	0.000822145	0.248889
GO_PARENTAL_BEHAVIOR	-0.500108	0.000829688	0.248889
BASAKI_YBX1_TARGETS_DN	-0.499961	0.000829688	0.248889
CHEMNITZ_RESPONSE_TO_PROSTAGLANDIN_E2_DN	-0.498899	0.000844773	0.248889
GO_POLYSACCHARIDE_BIOSYNTHETIC_PROCESS	-0.497419	0.000912657	0.263043
CAIRO_HEPATOBLASTOMA_DN	-0.494725	0.000988083	0.27284
BRAF.Weeks_DN	-0.494583	0.000988083	0.27284
IPA_HDAC10_DN	-0.491196	0.00107859	0.27284
GO_RELAXATION_OF_MUSCLE	-0.490349	0.00110876	0.27284
SESTO_RESPONSE_TO_UV_C4	-0.488688	0.00117665	0.27284
GO_RAGE_RECEPTOR_BINDING	-0.488517	0.00119173	0.27284
DEBIASI_APOPTOSIS_BY_REOVIRUS_INFECTION_UP	-0.488408	0.00119173	0.27284
GO_PHOSPHATIDYLCHOLINE_BIOSYNTHETIC_PROCESS	-0.487974	0.00121436	0.27284
REACTOME_COMPLEMENT_CASCADE	-0.487096	0.00123699	0.27284
GO_VESICLE_DOCKING_INVOLVED_IN_EXOCYTOSIS	-0.486459	0.00125207	0.27284
GO_ONE_CARBON_COMPOUND_TRANSPORT	-0.486348	0.00125207	0.27284
DACOSTA_LOW_DOSE_UV_RESPONSE_VIA_ERCC3_XPCS_DN	-0.486054	0.00125207	0.27284
MTOR_UP.V1_UP	-0.485625	0.00125207	0.27284
CHARAFE_BREAST_CANCER_LUMINAL_VS_BASAL_DN	-0.485254	0.00125207	0.27284
BIOCARTA_IL10_PATHWAY	-0.484905	0.00128224	0.27284
REACTOME_ACTIVATION_OF_RAC	-0.484713	0.00128979	0.27284
IPA_FOXP3_UP	-0.484031	0.0013275	0.27284
DAUER_STAT3_TARGETS_DN	-0.483334	0.00134259	0.27284
MARTINELLI_IMMATURE_NEUTROPHIL_UP	-0.482061	0.00142555	0.27284
MEKdd.Lung_SALE.Weeks_DN	-0.481914	0.00142555	0.27284
GO_OLIGOSACCHARIDE_BIOSYNTHETIC_PROCESS	-0.480998	0.00145572	0.27284
GO_COMPLEMENT_ACTIVATION_ALTERNATIVE_PATHWAY	-0.480259	0.00147835	0.27284
GO_CYSTEINE_TYPE_ENDOPEPTIDASE_ACTIVITY_INVOLVED_IN_APOPTOTIC_PROCESS	-0.479996	0.0014859	0.27284
GO_POSITIVE_REGULATION_OF_PROTEIN_LOCALIZATION_TO_CELL_PERIPHERY	-0.479934	0.00149344	0.27284
DER_IFN_ALPHA_RESPONSE_UP	-0.478846	0.00153869	0.27284
GO_POTASSIUM_ION_IMPORT	-0.478393	0.00155378	0.27284
HUMMERICH_BENIGN_SKIN_TUMOR_UP	-0.476975	0.00161412	0.27284
KOBAYASHI_EGFR_SIGNALING_24HR_UP	-0.476913	0.00162166	0.27284
GO_ALDO_KETO_REDUCTASE_NADP_ACTIVITY	-0.476807	0.00162166	0.27284
SCHMAHL_PDGF_SIGNALING	-0.476623	0.00162921	0.27284
SHARMA_PILOCYTIC_ASTROCYTOMA_LOCATION_UP	-0.476309	0.00163675	0.27284
RICKMAN_TUMOR_DIFFERENTIATED_MODERATELY_VS_POORLY_UP	-0.476303	0.00163675	0.27284
KEEN_RESPONSE_TO_ROSIGLITAZONE_DN	-0.476082	0.00164429	0.27284
GO_SERINE_HYDROLASE_ACTIVITY	-0.475892	0.00166692	0.27284
ZHENG_IL22_SIGNALING_UP	-0.475832	0.00166692	0.27284
YORDY_RECIPROCAL_REGULATION_BY_ETS1_AND_SP100_DN	-0.474572	0.00170463	0.27561
GO_PHOSPHATIDYLCHOLINE_METABOLIC_PROCESS	-0.474188	0.00176497	0.278571
GO_NEGATIVE_REGULATION_OF_DENDRITE_MORPHOGENESIS	-0.474128	0.00176497	0.278571
GO_CATION_TRANSPORTING_ATPASE_COMPLEX	-0.472928	0.00183286	0.280682
YAO_TEMPORAL_RESPONSE_TO_PROGESTERONE_CLUSTER_9	-0.4727	0.00184794	0.280682
GRUETZMANN_PANCREATIC_CANCER_UP	-0.472383	0.00185548	0.280682
IZADPANAH_STEM_CELL_ADIPOSE_VS_BONE_UP	-0.472237	0.00186303	0.280682
GO_HEXOSAMINIDASE_ACTIVITY	-0.470893	0.00194599	0.289888
TAKEDA_TARGETS_OF_NUP98_HOXA9_FUSION_3D_UP	-0.469147	0.00204405	0.301111
GO_AMMONIUM_ION_BINDING	-0.468108	0.0020893	0.304396
CRX_DN.V1_UP	-0.466722	0.00216473	0.311957
GO_O_GLYCAN_PROCESSING	-0.466127	0.0021949	0.312903
REACTOME_PASSIVE_TRANSPORT_BY_AQUAPORINS	-0.465445	0.00226278	0.319149
SEITZ_NEOPLASTIC_TRANSFORMATION_BY_8P_DELETION_UP	-0.464857	0.00232313	0.320833
IPA_STAT2_UP	-0.464724	0.00232313	0.320833
WATTEL_AUTONOMOUS_THYROID_ADENOMA_DN	-0.463768	0.00238347	0.324762
GAZDA_DIAMOND_BLACKFAN_ANEMIA_MYELOID_UP	-0.462172	0.00250415	0.324762
VECCHI_GASTRIC_CANCER_ADVANCED_VS_EARLY_DN	-0.462147	0.00250415	0.324762
GO_REGULATION_OF_THE_FORCE_OF_HEART_CONTRACTION	-0.46194	0.00253432	0.324762
MCBRYAN_PUBERTAL_TGFB1_TARGETS_DN	-0.461603	0.00256449	0.324762
ROETH_TERT_TARGETS_UP	-0.461544	0.00256449	0.324762
MASSARWEH_TAMOXIFEN_RESISTANCE_UP	-0.461477	0.00257203	0.324762
SHAFFER_IRF4_TARGETS_IN_MYELOMA_VS_MATURE_B_LYMPHOCYTE	-0.461464	0.00257203	0.324762
MANTOVANI_NFKB_TARGETS_UP	-0.461448	0.00257203	0.324762
RUAN_RESPONSE_TO_TNF_UP	-0.460235	0.00263992	0.330189
FEVR_CTNNB1_TARGETS_UP	-0.459896	0.00267763	0.331776
NIELSEN_GIST_VS_SYNOVIAL_SARCOMA_DN	-0.458357	0.00282094	0.332456
ZHU_CMV_8_HR_UP	-0.458236	0.00282094	0.332456
GO_ADENOHYPOPHYSIS_DEVELOPMENT	-0.458107	0.00282094	0.332456
GRANDVAUX_IRF3_TARGETS_UP	-0.457953	0.00282094	0.332456
TONKS_TARGETS_OF_RUNX1_RUNX1T1_FUSION_SUSTAINDED_IN_ERYTHROCYTE_UP	-0.457902	0.00282094	0.332456
GO_TRIGLYCERIDE_RICH_LIPOPROTEIN_PARTICLE	-0.457155	0.00284357	0.332456
GO_POTASSIUM_TRANSPORTING_ATPASE_ACTIVITY	-0.456741	0.00285865	0.332456
TAKEDA_TARGETS_OF_NUP98_HOXA9_FUSION_3D_DN	-0.455336	0.00292653	0.332479
ETV1.Lung_SALE_Skin_PMEL.24_DN	-0.455332	0.00292653	0.332479
GO_TRIGLYCERIDE_CATABOLIC_PROCESS	-0.455222	0.00293408	0.332479
GO_PLATELET_DENSE_GRANULE_LUMEN	-0.454042	0.0030623	0.342975
GO_SODIUM_ION_EXPORT	-0.453146	0.00313019	0.342975
WANG_RESPONSE_TO_BEXAROTENE_DN	-0.453052	0.00313019	0.342975
DER_IFN_BETA_RESPONSE_UP	-0.453025	0.00313019	0.342975
ACEVEDO_FGFR1_TARGETS_IN_PROSTATE_CANCER_MODEL_UP	-0.451603	0.00328104	0.356557
IPA_IRF2_DN	-0.45086	0.00332629	0.358537
GO_FUSION_OF_SPERM_TO_EGG_PLASMA_MEMBRANE	-0.4494	0.00342435	0.3632
FUJII_YBX1_TARGETS_UP	-0.449366	0.00342435	0.3632
AKT_UP.V1_UP	-0.44918	0.00345452	0.363492
LABBE_TARGETS_OF_TGFB1_AND_WNT3A_DN	-0.448914	0.00350732	0.366142
GO_FATTY_ACID_METABOLIC_PROCESS	-0.448316	0.00356766	0.369531
GO_RIBONUCLEOPROTEIN_COMPLEX_BINDING	-0.448052	0.00360537	0.370543
ZEILSTRA_CD44_TARGETS_DN	-0.446842	0.00373359	0.375373
GO_POSITIVE_REGULATION_OF_PROTEIN_TARGETING_TO_MEMBRANE	-0.446588	0.00377131	0.375373
GO_RESPONSE_TO_OSMOTIC_STRESS	-0.446549	0.00377131	0.375373
GO_PEPTIDE_CROSS_LINKING	-0.446542	0.00377131	0.375373
BROWNE_HCMV_INFECTION_4HR_UP	-0.446483	0.00379394	0.375373
MONNIER_POSTRADIATION_TUMOR_ESCAPE_DN	-0.445977	0.00383919	0.377037
BIOCARTA_TCAPOPTOSIS_PATHWAY	-0.445507	0.0038769	0.377941
BENNETT_SYSTEMIC_LUPUS_ERYTHEMATOSUS	-0.445364	0.00390707	0.378102
TAKEDA_TARGETS_OF_NUP98_HOXA9_FUSION_8D_UP	-0.444656	0.00397496	0.381884
REACTOME_P2Y_RECEPTORS	-0.444259	0.00400513	0.382014
LIN_SILENCED_BY_TUMOR_MICROENVIRONMENT	-0.443905	0.00405793	0.38227
ZHU_CMV_24_HR_UP	-0.443525	0.00406547	0.38227
LEE_AGING_CEREBELLUM_UP	-0.443196	0.00409564	0.382394
GO_REGULATION_OF_PLASMA_MEMBRANE_ORGANIZATION	-0.442487	0.00420878	0.385517
HECKER_IFNB1_TARGETS	-0.442446	0.00421632	0.385517
IPA_HOXC4_UP	-0.442438	0.00421632	0.385517
IPA_DDIT3_DN	-0.440672	0.00436717	0.396575
GO_ENDOPEPTIDASE_ACTIVITY	-0.440224	0.00441997	0.398639
SARRIO_EPITHELIAL_MESENCHYMAL_TRANSITION_DN	-0.439665	0.00448786	0.4
RUAN_RESPONSE_TO_TROGLITAZONE_UP	-0.439506	0.00451803	0.4
TSAI_DNAJB4_TARGETS_UP	-0.439467	0.00452557	0.4
IPA_NCOA2_UP	-0.438704	0.00461608	0.402632
CAHOY_ASTROGLIAL	-0.438671	0.00461608	0.402632
NAKAMURA_TUMOR_ZONE_PERIPHERAL_VS_CENTRAL_DN	-0.437363	0.00478956	0.406135
PID_TOLL_ENDOGENOUS_PATHWAY	-0.437114	0.00482727	0.406135
GO_FUCOSE_METABOLIC_PROCESS	-0.436991	0.00482727	0.406135
GO_PRIMARY_LYSOSOME	-0.436392	0.00485744	0.406135
GO_OXIDOREDUCTASE_ACTIVITY_ACTING_ON_NAD_P_H_OXYGEN_AS_ACCEPTOR	-0.436355	0.00485744	0.406135
ZHANG_ANTIVIRAL_RESPONSE_TO_RIBAVIRIN_UP	-0.436119	0.0049027	0.406135
ABBUD_LIF_SIGNALING_2_DN	-0.436059	0.00491024	0.406135
GO_2_OXOGLUTARATE_METABOLIC_PROCESS	-0.436045	0.00491024	0.406135
GO_G_PROTEIN_ALPHA_SUBUNIT_BINDING	-0.435011	0.00497813	0.406135
VANHARANTA_UTERINE_FIBROID_DN	-0.434645	0.00499321	0.406135
IPA_NR2C1_UP	-0.434417	0.00499321	0.406135
GO_MAGNESIUM_ION_TRANSPORT	-0.434022	0.00504601	0.407927
GO_VESICLE_TARGETING	-0.433276	0.00510635	0.410303
ACAACCT_MIR453	-0.433144	0.00514406	0.410843
GO_CELLULAR_RESPONSE_TO_EXOGENOUS_DSRNA	-0.432097	0.0052572	0.413609
COLDREN_GEFITINIB_RESISTANCE_DN	-0.432033	0.00526475	0.413609
MAHADEVAN_RESPONSE_TO_MP470_UP	-0.431926	0.00527229	0.413609
MEKdd.24_UP	-0.431377	0.00533263	0.415882
ETV1.Breast_HMLE_Skin_PMEL.24_UP	-0.430288	0.00543068	0.418605
ISRE_01	-0.430285	0.00543068	0.418605
GO_PEPTIDASE_ACTIVITY	-0.429721	0.00551365	0.422543
GO_REGULATION_OF_T_CELL_MEDIATED_CYTOTOXICITY	-0.429434	0.00556645	0.424138
GROSS_HYPOXIA_VIA_HIF1A_ONLY	-0.4289	0.00561171	0.424294
REACTOME_GAP_JUNCTION_DEGRADATION	-0.428569	0.00564942	0.424294
GO_GLYCOPROTEIN_CATABOLIC_PROCESS	-0.428457	0.0056645	0.424294
CHEN_LUNG_CANCER_SURVIVAL	-0.427611	0.00575502	0.426667
GO_TRANSFERASE_ACTIVITY_TRANSFERRING_HEXOSYL_GROUPS	-0.427336	0.0057701	0.426667
MEL18_DN.V1_DN	-0.427202	0.00579273	0.426667
MOOTHA_GLYCOGEN_METABOLISM	-0.426421	0.00585307	0.426923
LABBE_TGFB1_TARGETS_DN	-0.426212	0.00586061	0.426923
GO_PROTEIN_ACTIVATION_CASCADE	-0.425261	0.00600392	0.431892
HELLER_SILENCED_BY_METHYLATION_DN	-0.425241	0.00600392	0.431892
ONDER_CDH1_TARGETS_2_DN	-0.425187	0.00602655	0.431892
BUDHU_LIVER_CANCER_METASTASIS_UP	-0.424983	0.00606426	0.432258
GO_TRANSITION_METAL_ION_HOMEOSTASIS	-0.424674	0.00613215	0.434759
WANG_HCP_PROSTATE_CANCER	-0.424449	0.00616986	0.435106
GO_INFLAMMASOME_COMPLEX	-0.423766	0.00630563	0.440526
GO_NUCLEOSIDE_DIPHOSPHATE_KINASE_ACTIVITY	-0.423588	0.00631317	0.440526
KEGG_ARACHIDONIC_ACID_METABOLISM	-0.422856	0.00641122	0.44433
RICKMAN_HEAD_AND_NECK_CANCER_E	-0.422456	0.00646402	0.44433
MTOR_UP.N4.V1_UP	-0.422431	0.00647156	0.44433
GO_PHOSPHATIDYLSERINE_METABOLIC_PROCESS	-0.42232	0.00650173	0.44433
FURUKAWA_DUSP6_TARGETS_PCI35_UP	-0.421813	0.00655453	0.445641
GO_REGULATION_OF_ESTABLISHMENT_OF_PROTEIN_LOCALIZATION_TO_PLASMA_MEMBRANE	-0.421426	0.00661487	0.447449
FOXM1_01	-0.420788	0.00675818	0.454822
GRAESSMANN_APOPTOSIS_BY_SERUM_DEPRIVATION_UP	-0.420102	0.00690149	0.458706
GO_MEMBRANE_TUBULATION	-0.420098	0.00690149	0.458706
LUDWICZEK_TREATING_IRON_OVERLOAD	-0.419887	0.00693921	0.458706
GO_NUCLEOSIDE_DIPHOSPHATE_METABOLIC_PROCESS	-0.419801	0.00695429	0.458706
GAUSSMANN_MLL_AF4_FUSION_TARGETS_B_DN	-0.419417	0.00702218	0.460891
GO_KERATINOCYTE_DIFFERENTIATION	-0.418684	0.00714286	0.464216
VERHAAK_GLIOBLASTOMA_NEURAL	-0.418681	0.00714286	0.464216
TSUNODA_CISPLATIN_RESISTANCE_DN	-0.41806	0.00724091	0.468293
MYLLYKANGAS_AMPLIFICATION_HOT_SPOT_7	-0.417355	0.00733142	0.471845
GO_RESPONSE_TO_MERCURY_ION	-0.416511	0.00748982	0.472614
CHIARADONNA_NEOPLASTIC_TRANSFORMATION_CDC25_DN	-0.416425	0.0075049	0.472614
GARGALOVIC_RESPONSE_TO_OXIDIZED_PHOSPHOLIPIDS_GREEN_UP	-0.416335	0.00753507	0.472614
TGTYNNNNNRGCARM_UNKNOWN	-0.416201	0.00755016	0.472614
GO_PROTEASE_BINDING	-0.415805	0.00763313	0.472614
ATM_DN.V1_DN	-0.415487	0.00769347	0.472614
KOHOUTEK_CCNT2_TARGETS	-0.415354	0.00770855	0.472614
EINAV_INTERFERON_SIGNATURE_IN_CANCER	-0.415304	0.0077161	0.472614
GO_RESPONSE_TO_METHYLMERCURY	-0.415282	0.00772364	0.472614
SA_CASPASE_CASCADE	-0.415057	0.00775381	0.472614
GO_RESPIRATORY_GASEOUS_EXCHANGE	-0.414892	0.00780661	0.472614
GGGNRMNNYCAT_UNKNOWN	-0.414066	0.00794237	0.472614
DARWICHE_PAPILLOMA_PROGRESSION_RISK	-0.413997	0.007965	0.472614
GO_DIVALENT_INORGANIC_ANION_HOMEOSTASIS	-0.413844	0.00799517	0.472614
GO_NEGATIVE_REGULATION_OF_DEFENSE_RESPONSE	-0.413785	0.00799517	0.472614
SATO_SILENCED_BY_DEACETYLATION_IN_PANCREATIC_CANCER	-0.413579	0.00803289	0.472614
CHIBA_RESPONSE_TO_TSA	-0.413451	0.00805551	0.472614
SMITH_TERT_TARGETS_DN	-0.413205	0.0080706	0.472614
WANG_TARGETS_OF_MLL_CBP_FUSION_UP	-0.413048	0.00808568	0.472614
BYSTRYKH_HEMATOPOIESIS_STEM_CELL_RUNX1	-0.412568	0.00811585	0.472614
YAP.mt.Breast_HMLE_Lung_SALE_UP	-0.41253	0.0081234	0.472614
CHARAFE_BREAST_CANCER_BASAL_VS_MESENCHYMAL_UP	-0.411587	0.00831196	0.472614
HOSHIDA_LIVER_CANCER_SUBCLASS_S3	-0.411565	0.00831196	0.472614
REACTOME_CASPASE_MEDIATED_CLEAVAGE_OF_CYTOSKELETAL_PROTEINS	-0.411002	0.00843264	0.472614
DUTERTRE_ESTRADIOL_RESPONSE_24HR_DN	-0.410741	0.00847036	0.472614
WOTTON_RUNX_TARGETS_DN	-0.410616	0.00850053	0.472614
GO_ENDOPLASMIC_RETICULUM_GOLGI_INTERMEDIATE_COMPARTMENT_MEMBRANE	-0.410614	0.00850053	0.472614
HNF4_01	-0.410563	0.00850053	0.472614
GO_REGULATION_OF_PROTEIN_ACTIVATION_CASCADE	-0.410316	0.00854578	0.472614
ZEMBUTSU_SENSITIVITY_TO_CYCLOPHOSPHAMIDE	-0.410186	0.00856087	0.472614
GO_NEGATIVE_REGULATION_OF_MULTI_ORGANISM_PROCESS	-0.410092	0.00856841	0.472614
SCHAEFFER_PROSTATE_DEVELOPMENT_48HR_UP	-0.410019	0.00859104	0.472614
BOWIE_RESPONSE_TO_EXTRACELLULAR_MATRIX	-0.409964	0.00859104	0.472614
SABATES_COLORECTAL_ADENOMA_SIZE_DN	-0.409923	0.00859104	0.472614
WONG_IFNA2_RESISTANCE_UP	-0.409908	0.00859104	0.472614
GO_ESTABLISHMENT_OR_MAINTENANCE_OF_TRANSMEMBRANE_ELECTROCHEMICAL_GRADIENT	-0.409339	0.00877206	0.472901
BOWIE_RESPONSE_TO_TAMOXIFEN	-0.409113	0.00880223	0.472901
GO_PROTEIN_SELF_ASSOCIATION	-0.409035	0.00881732	0.472901
BROWNE_HCMV_INFECTION_6HR_UP	-0.408378	0.008938	0.472901
GO_POTASSIUM_ION_HOMEOSTASIS	-0.408353	0.008938	0.472901
KEGG_COMPLEMENT_AND_COAGULATION_CASCADES	-0.407955	0.00902851	0.472901
LANDIS_ERBB2_BREAST_PRENEOPLASTIC_DN	-0.407869	0.00902851	0.472901
PEDERSEN_METASTASIS_BY_ERBB2_ISOFORM_6	-0.407791	0.00903605	0.472901
BRAF.Breast_HMLE_Skin_PMEL.Weeks_DN	-0.407593	0.00909639	0.472901
KRAS.AMP.LUNG_UP.V1_DN	-0.407569	0.00909639	0.472901
GO_BARBED_END_ACTIN_FILAMENT_CAPPING	-0.407432	0.00912657	0.472901
WANG_CLIM2_TARGETS_DN	-0.407361	0.00913411	0.472901
TSAI_RESPONSE_TO_RADIATION_THERAPY	-0.407328	0.00913411	0.472901
RGAANNTTC_HSF1_01	-0.40706	0.00918691	0.472901
MARCHINI_TRABECTEDIN_RESISTANCE_UP	-0.406855	0.00921708	0.472901
ONKEN_UVEAL_MELANOMA_UP	-0.406684	0.00924725	0.472901
IWANAGA_CARCINOGENESIS_BY_KRAS_PTEN_UP	-0.406636	0.00924725	0.472901
ZHANG_INTERFERON_RESPONSE	-0.406485	0.00926987	0.472901
GO_PINOCYTOSIS	-0.406414	0.0092925	0.472901
TOOKER_GEMCITABINE_RESISTANCE_UP	-0.406196	0.00931513	0.472901
CCGNMNNTNACG_UNKNOWN	-0.406082	0.0093453	0.472901
KRAS.Weeks_DN	-0.405721	0.0093981	0.473585
GO_DNA_LIGATION	-0.405565	0.00944335	0.473585
GO_COENZYME_CATABOLIC_PROCESS	-0.405466	0.00946598	0.473585
JACKSON_DNMT1_TARGETS_UP	-0.404863	0.00956404	0.476493
JECHLINGER_EPITHELIAL_TO_MESENCHYMAL_TRANSITION_DN	-0.404551	0.00963192	0.476493
REACTOME_SPHINGOLIPID_METABOLISM	-0.404477	0.00963192	0.476493
GO_CALCIUM_DEPENDENT_CYSTEINE_TYPE_ENDOPEPTIDASE_ACTIVITY	-0.403897	0.00973752	0.478148
GO_REGULATION_OF_MEMBRANE_LIPID_DISTRIBUTION	-0.40388	0.00973752	0.478148
GO_HSP90_PROTEIN_BINDING	-0.403574	0.00982049	0.479853
GO_EXOCYST	-0.403298	0.00987328	0.479853
SMID_BREAST_CANCER_RELAPSE_IN_BRAIN_DN	-0.403292	0.00988083	0.479853
GO_BIOTIN_METABOLIC_PROCESS	-0.403059	0.00994871	0.481387
